# Supplementary material for: Identification and clinical implications of the immune-related hub genes in psoriasis
Source: Research Square preprint supplement (doi:10.21203/rs.3.rs-5782804/v1), 2025-01-13
Supplement: Supplementary file 2 [file 4f8eefcd4df14732cad6c4c9.docx]

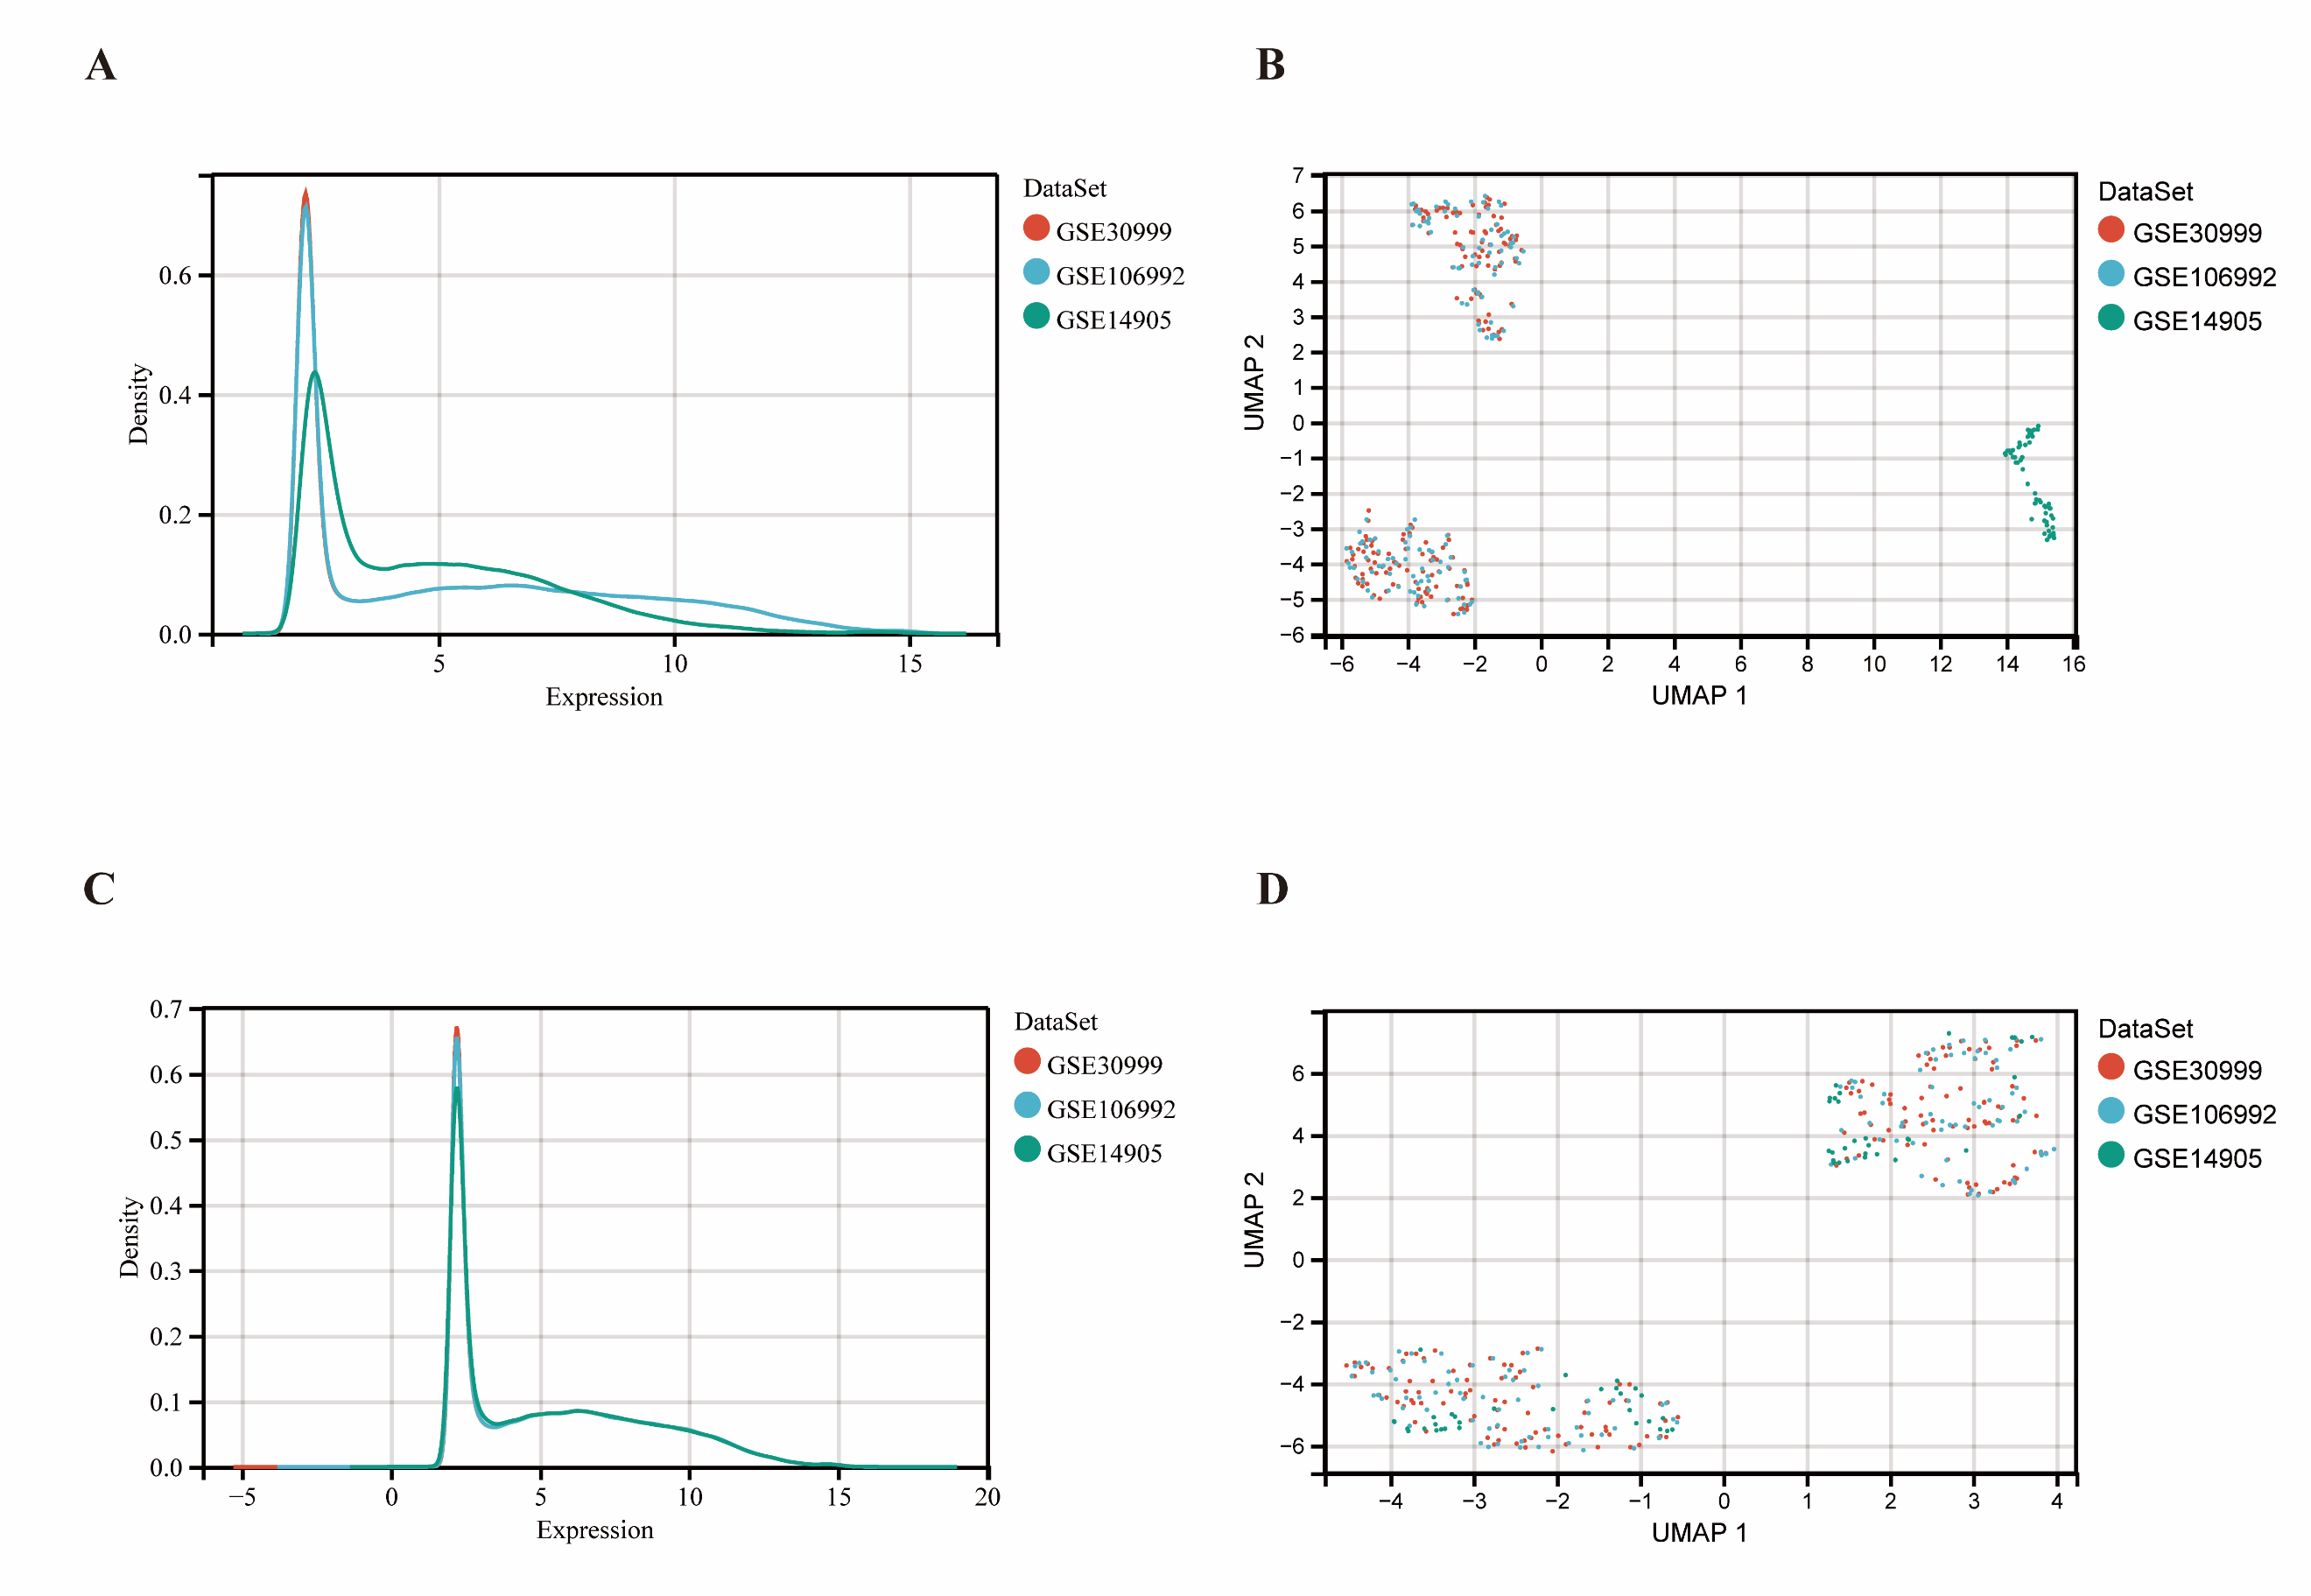


Figure S1 Analysis of de-batch effect. (A) Density diagram and UMAP plot (B) of the dataset before the de-batch effect. (C) Density diagram and UMAP plot (D) of the dataset after the de-batch effect.
