# Supplementary material for: Identification and clinical implications of the immune-related hub genes in psoriasis
Source: Research Square preprint supplement (doi:10.21203/rs.3.rs-5782804/v1), 2025-01-13
Supplement: Supplementary file 6 [file c73932caf90d5d3299eda7a5.docx]

# Table S5 The results of the comparison between the ROC curves by MedCalc software.

| Variable 1 | CLEC7A |
| --- | --- |
| Variable 2 | CXCL1 |
| Variable 3 | IRF1 |
| Variable 4 | S100A12 |
| Variable 5 | S100A8 |
| Variable 6 | S100A9 |
| Classification variable | Psoriasis |

| Sample size | 365 |
| --- | --- |
| Positive group a | 185 (50.68%) |
| Negative group b | 180 (49.32%) |

a Psoriasis = 1
b Psoriasis = 0

| Variable | AUC | SE a | 95% CI b |
| --- | --- | --- | --- |
| CLEC7A | 0.989 | 0.00461 | 0.971 to 0.997 |
| CXCL1 | 0.966 | 0.0106 | 0.942 to 0.982 |
| IRF1 | 0.956 | 0.00962 | 0.929 to 0.974 |
| S100A12 | 0.983 | 0.00812 | 0.964 to 0.994 |
| S100A8 | 0.977 | 0.00818 | 0.957 to 0.990 |
| S100A9 | 0.983 | 0.00757 | 0.964 to 0.994 |

a DeLong et al., 1988

b Binomial exact

## Pairwise comparison of ROC curves

| CLEC7A ~ CXCL1 | |
| --- | --- |
| Difference between areas | 0.0221 |
| Standard Error a | 0.00891 |
| 95% Confidence Interval | 0.00459 to 0.0395 |
| z statistic | 2.475 |
| Significance level | P = 0.0133 |
| CLEC7A ~ IRF1 | |
| Difference between areas | 0.0329 |
| Standard Error a | 0.00857 |
| 95% Confidence Interval | 0.0161 to 0.0497 |
| z statistic | 3.842 |
| Significance level | P = 0.0001 |
| CLEC7A ~ S100A12 | |
| Difference between areas | 0.00527 |
| Standard Error a | 0.00482 |
| 95% Confidence Interval | -0.00418 to 0.0147 |
| z statistic | 1.093 |
| Significance level | P = 0.2745 |
| CLEC7A ~ S100A8 | |
| Difference between areas | 0.0110 |
| Standard Error a | 0.00525 |
| 95% Confidence Interval | 0.000736 to 0.0213 |
| z statistic | 2.100 |
| Significance level | P = 0.0357 |
| CLEC7A ~ S100A9 | |
| Difference between areas | 0.00554 |
| Standard Error a | 0.00482 |
| 95% Confidence Interval | -0.00392 to 0.0150 |
| z statistic | 1.148 |
| Significance level | P = 0.2508 |
| CXCL1 ~ IRF1 | |
| Difference between areas | 0.0109 |
| Standard Error a | 0.0121 |
| 95% Confidence Interval | -0.0129 to 0.0346 |
| z statistic | 0.897 |
| Significance level | P = 0.3699 |
| CXCL1 ~ S100A12 | |
| Difference between areas | 0.0168 |
| Standard Error a | 0.00801 |
| 95% Confidence Interval | 0.00109 to 0.0325 |
| z statistic | 2.096 |
| Significance level | P = 0.0361 |
| CXCL1 ~ S100A8 | |
| Difference between areas | 0.0110 |
| Standard Error a | 0.00784 |
| 95% Confidence Interval | -0.00433 to 0.0264 |
| z statistic | 1.408 |
| Significance level | P = 0.1591 |
| CXCL1 ~ S100A9 | |
| Difference between areas | 0.0165 |
| Standard Error a | 0.00706 |
| 95% Confidence Interval | 0.00268 to 0.0304 |
| z statistic | 2.340 |
| Significance level | P = 0.0193 |
| IRF1 ~ S100A12 | |
| Difference between areas | 0.0276 |
| Standard Error a | 0.0100 |
| 95% Confidence Interval | 0.00799 to 0.0473 |
| z statistic | 2.757 |
| Significance level | P = 0.0058 |
| IRF1 ~ S100A8 | |
| Difference between areas | 0.0219 |
| Standard Error a | 0.0101 |
| 95% Confidence Interval | 0.00203 to 0.0418 |
| z statistic | 2.160 |
| Significance level | P = 0.0308 |
| IRF1 ~ S100A9 | |
| Difference between areas | 0.0274 |
| Standard Error a | 0.0101 |
| 95% Confidence Interval | 0.00754 to 0.0472 |
| z statistic | 2.706 |
| Significance level | P = 0.0068 |
| S100A12 ~ S100A8 | |
| Difference between areas | 0.00575 |
| Standard Error a | 0.00367 |
| 95% Confidence Interval | -0.00144 to 0.0129 |
| z statistic | 1.567 |
| Significance level | P = 0.1170 |
| S100A12 ~ S100A9 | |
| Difference between areas | 0.000270 |
| Standard Error a | 0.00393 |
| 95% Confidence Interval | -0.00744 to 0.00798 |
| z statistic | 0.0687 |
| Significance level | P = 0.9452 |
| S100A8 ~ S100A9 | |
| Difference between areas | 0.00548 |
| Standard Error a | 0.00376 |
| 95% Confidence Interval | -0.00188 to 0.0128 |
| z statistic | 1.459 |
| Significance level | P = 0.1444 |

a DeLong et al., 1988
